# Supplementary material
Source: ML conference proceedings conference paper supplement (https://openreview.net/forum?id=w6rJxukAap)
Supplement: supplementary_material [file attachment]

# RFFNet: Towards Robust and Flexible Fusion for Low-Light Image Denoising

## Supplementary Material

### 1 MORE QUANTITATIVE EXPERIMENTS

To further demonstrate the effectiveness of our approach in extremely low-light environments, we evaluate our RFFNet on the DVD [7] test set under Gaussian-Poisson mixed noise with  $\sigma=8$  and the FAID [1] test set under Gaussian noise with  $\sigma=100$ . We compare our results with state-of-the-art guided image denoising approaches, including DKN [8], SVLRM [10], CUNet [6], SANet [11], DVN [7], DeepFnF [12] and RIDFnF [9]. Additionally, we also consider single-image denoising methods, such as RIDNet [2], SADNet [3], NBNNet [5], MPRNet [14], Restormer [13], and NAFNet [4]. All compared methods are trained on the same training set as ours. Tab. 1 shows that our method achieves the best results.

**Table 1: The average PSNR, SSIM, and LPIPS on the DVD [7] test set with noise level  $\sigma=8$  and FAID [1] test set with noise level  $\sigma=1000$ . The best results are highlighted in boldface.**

| Methods        | DVD ( $\sigma=8$ ) |                 |                    | FAID ( $\sigma=100$ ) |                 |                    |
|----------------|--------------------|-----------------|--------------------|-----------------------|-----------------|--------------------|
|                | PSNR $\uparrow$    | SSIM $\uparrow$ | LPIPS $\downarrow$ | PSNR $\uparrow$       | SSIM $\uparrow$ | LPIPS $\downarrow$ |
| RIDNet [2]     | 24.23              | 0.855           | 0.162              | 28.83                 | 0.879           | 0.400              |
| SADNet [3]     | 25.14              | 0.880           | 0.149              | 30.84                 | 0.920           | 0.389              |
| NBNNet [5]     | 24.81              | 0.882           | 0.147              | 30.08                 | 0.918           | 0.395              |
| MPRNet [14]    | 26.20              | 0.891           | 0.141              | 31.28                 | 0.923           | 0.387              |
| Restormer [13] | 25.65              | 0.890           | 0.139              | 31.37                 | 0.923           | 0.381              |
| NAFNet [4]     | 25.23              | 0.886           | 0.138              | 31.54                 | 0.926           | 0.367              |
| DKN [8]        | 22.50              | 0.780           | 0.170              | 29.54                 | 0.910           | 0.354              |
| SVLRM [10]     | 21.27              | 0.971           | 0.164              | 30.03                 | 0.915           | 0.350              |
| CUNet [6]      | 24.49              | 0.850           | 0.147              | 31.49                 | 0.935           | 0.314              |
| SANet [11]     | 24.63              | 0.885           | 0.120              | 31.83                 | 0.937           | 0.306              |
| DVN [7]        | 26.98              | 0.915           | 0.109              | -                     | -               | -                  |
| DeepFnF [12]   | -                  | -               | -                  | 32.92                 | 0.949           | 0.285              |
| RIDFnF [9]     | -                  | -               | -                  | 32.97                 | 0.950           | 0.285              |
| <b>RFFNet</b>  | <b>27.13</b>       | <b>0.924</b>    | <b>0.099</b>       | <b>33.72</b>          | <b>0.955</b>    | <b>0.282</b>       |

### 2 MORE VISUAL RESULTS

In this section, we provide more qualitative comparisons for the two tasks: NIR-guided RGB image denoising (Fig. 1-Fig. 4), and flash-guided no-flash image denoising (Fig. 5-Fig. 8). In comparison, our RFFNet can not only effectively restore more salient structures and richer details, but also stably suppress the artifacts caused by inconsistency.

### REFERENCES

- [1] Yagiz Aksoy, Changil Kim, Petr Kellnhofer, Sylvain Paris, Mohamed Elgharib, Marc Pollefeys, and Wojciech Matusik. 2018. A dataset of flash and ambient illumination pairs from the crowd. In *Proceedings of the European Conference on Computer Vision (ECCV)*. 634–649.
- [2] Saeed Anwar and Nick Barnes. 2019. Real image denoising with feature attention. In *Proceedings of the IEEE/CVF international conference on computer vision*. 3155–3164.
- [3] Meng Chang, Qi Li, Huajun Feng, and Zhihai Xu. 2020. Spatial-adaptive network for single image denoising. In *Computer Vision–ECCV 2020: 16th European Conference, Glasgow, UK, August 23–28, 2020, Proceedings, Part XXX* 16. Springer, 171–187.
- [4] Liangyu Chen, Xiaojie Chu, Xiangyu Zhang, and Jian Sun. 2022. Simple baselines for image restoration. In *Computer Vision–ECCV 2022: 17th European Conference, Tel Aviv, Israel, October 23–27, 2022, Proceedings, Part VII*. Springer, 17–33.
- [5] Shen Cheng, Yuzhi Wang, Haibin Huang, Donghao Liu, Haoqiang Fan, and Shuaicheng Liu. 2021. Nbnnet: Noise basis learning for image denoising with subspace projection. In *Proceedings of the IEEE/CVF conference on computer vision and pattern recognition*. 4896–4906.
- [6] Xin Deng and Pier Luigi Dragotti. 2020. Deep convolutional neural network for multi-modal image restoration and fusion. *IEEE transactions on pattern analysis and machine intelligence* 43, 10 (2020), 3333–3348.
- [7] Shuangping Jin, Bingbing Yu, Minhao Jing, Yi Zhou, Jiajun Liang, and Renhe Ji. 2022. DarkVisionNet: Low-Light Imaging via RGB-NIR Fusion with Deep Inconsistency Prior. In *Proceedings of the AAAI Conference on Artificial Intelligence*, Vol. 36. 1104–1112.
- [8] Beomjun Kim, Jean Ponce, and Bumsu Ham. 2021. Deformable kernel networks for joint image filtering. *International Journal of Computer Vision* 129, 2 (2021), 579–600.
- [9] Geunwoo Oh, Jonghee Back, Jae-Pil Heo, and Bochang Moon. 2023. Robust Image Denoising of No-Flash Images Guided by Consistent Flash Images. In *Proceedings of the AAAI Conference on Artificial Intelligence*, Vol. 37. 1993–2001.
- [10] Jinshan Pan, Jiangxin Dong, Jimmy S Ren, Liang Lin, Jinhui Tang, and Ming-Hsuan Yang. 2019. Spatially variant linear representation models for joint filtering. In *Proceedings of the IEEE/CVF Conference on Computer Vision and Pattern Recognition*. 1702–1711.
- [11] Zehua Sheng, Zhu Yu, Xiongwei Liu, Si-Yuan Cao, Yuqi Liu, Hui-Liang Shen, and Huaqi Zhang. 2023. Structure Aggregation for Cross-Spectral Stereo Image Guided Denoising. In *Proceedings of the IEEE/CVF Conference on Computer Vision and Pattern Recognition*. 13997–14006.
- [12] Zhihao Xia, Michaël Gharbi, Federico Perazzi, Kalyan Sunkavalli, and Ayan Chakrabarti. 2021. Deep denoising of flash and no-flash pairs for photography in low-light environments. In *Proceedings of the IEEE/CVF Conference on Computer Vision and Pattern Recognition*. 2063–2072.
- [13] Syed Waqas Zamir, Aditya Arora, Salman Khan, Munawar Hayat, Fahad Shahbaz Khan, and Ming-Hsuan Yang. 2022. Restormer: Efficient transformer for high-resolution image restoration. In *Proceedings of the IEEE/CVF conference on computer vision and pattern recognition*. 5728–5739.
- [14] Syed Waqas Zamir, Aditya Arora, Salman Khan, Munawar Hayat, Fahad Shahbaz Khan, Ming-Hsuan Yang, and Ling Shao. 2021. Multi-stage progressive image restoration. In *Proceedings of the IEEE/CVF conference on computer vision and pattern recognition*. 14821–14831.

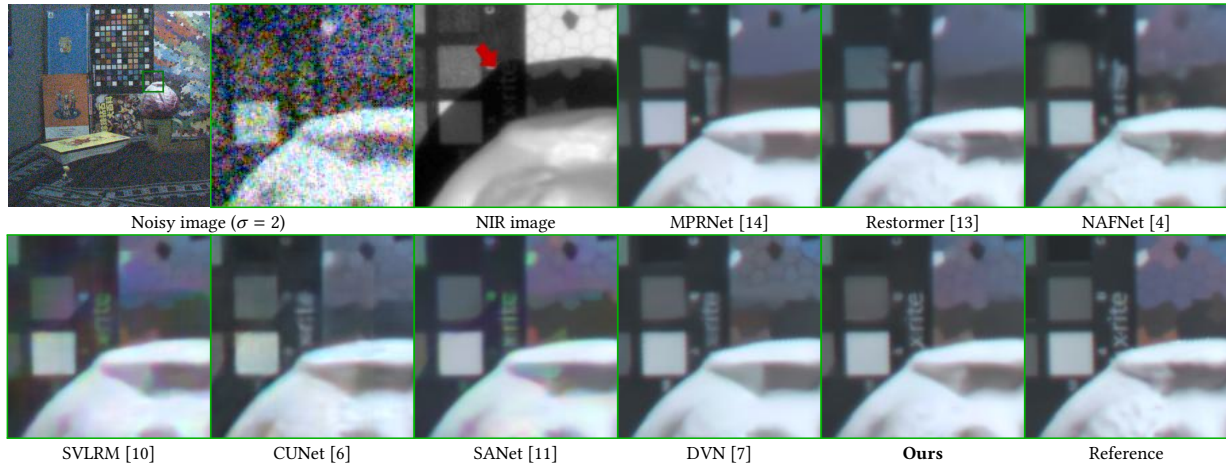

**Figure 1: The qualitative comparisons for NIR-guided RGB image denoising on DVD [7] with  $\sigma = 2$ .**

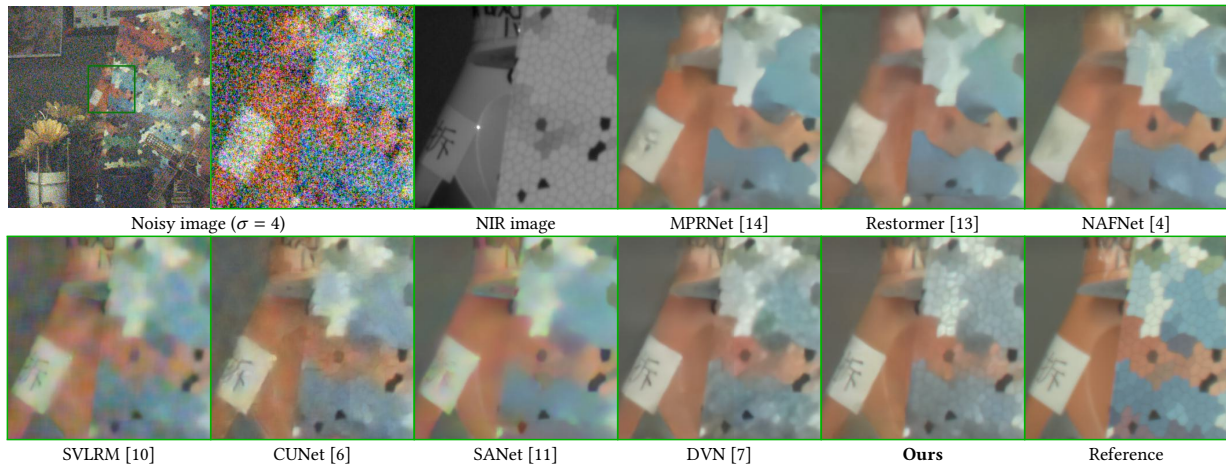

**Figure 2: The qualitative comparisons for NIR-guided RGB image denoising on DVD [7] with  $\sigma = 4$ .**

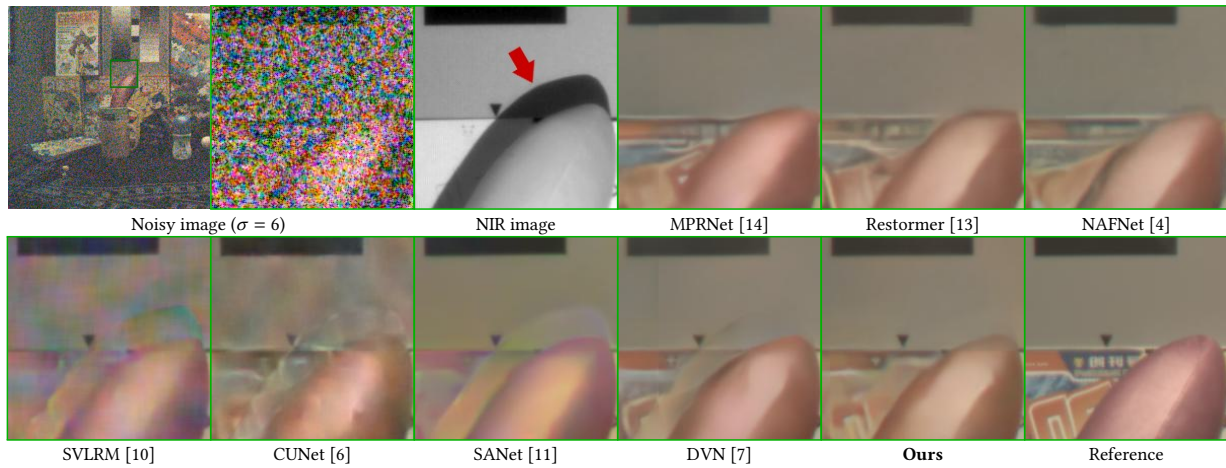

**Figure 3: The qualitative comparisons for NIR-guided RGB image denoising on DVD [7] with  $\sigma = 6$ .**

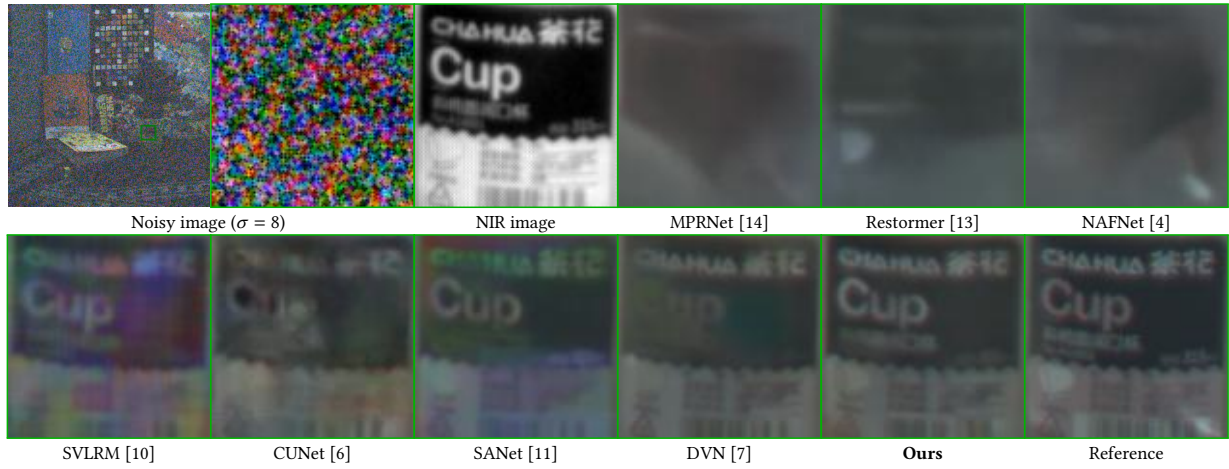

**Figure 4: The qualitative comparisons for NIR-guided RGB image denoising on DVD [7] with  $\sigma = 8$ .**

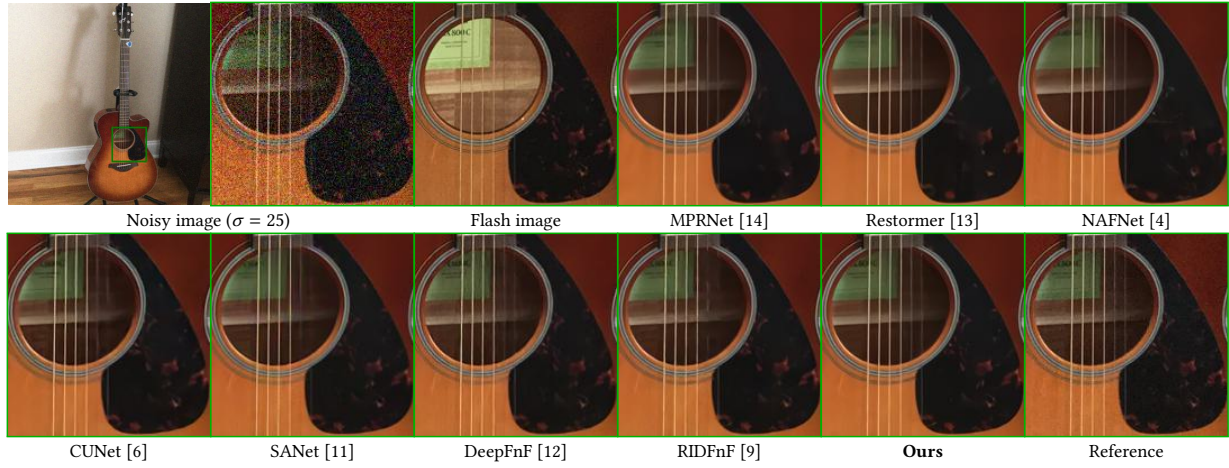

**Figure 5: The qualitative comparisons for flash-guided no-flash image denoising on FAID [1] with  $\sigma = 25$ .**

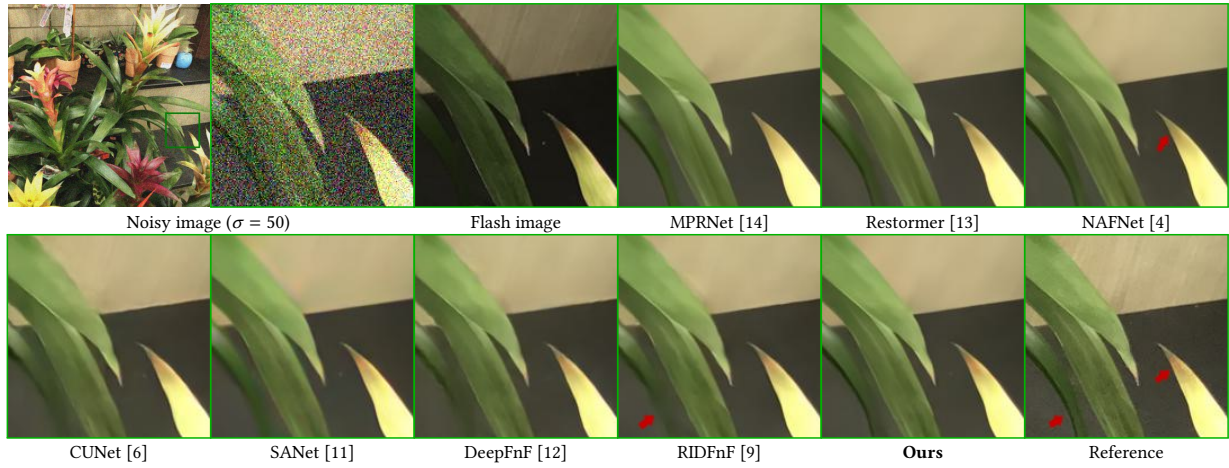

**Figure 6: The qualitative comparisons for flash-guided no-flash image denoising on FAID [1] with  $\sigma = 50$ .**



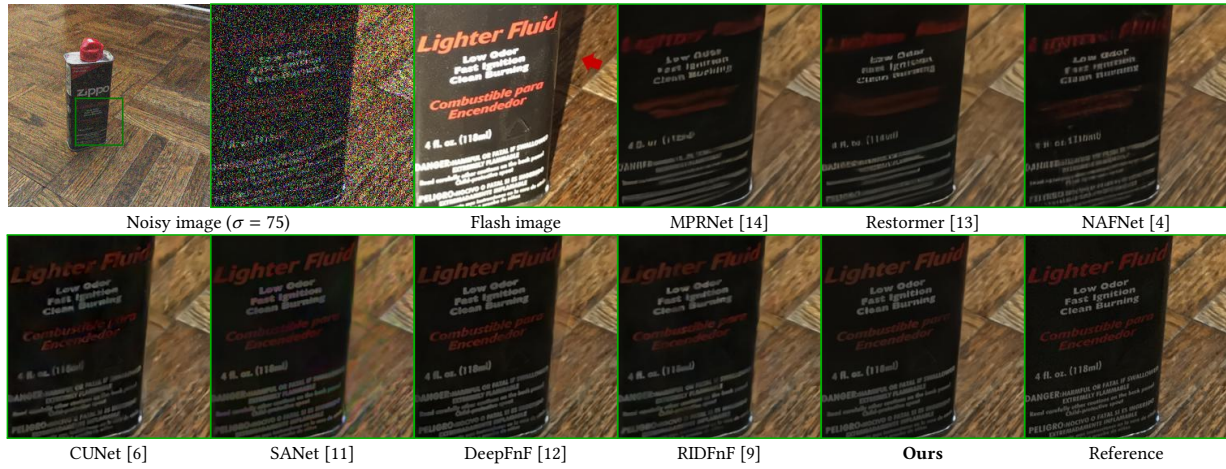

Figure 7: The qualitative comparisons for flash-guided no-flash image denoising on FAID [1] with  $\sigma = 75$ .

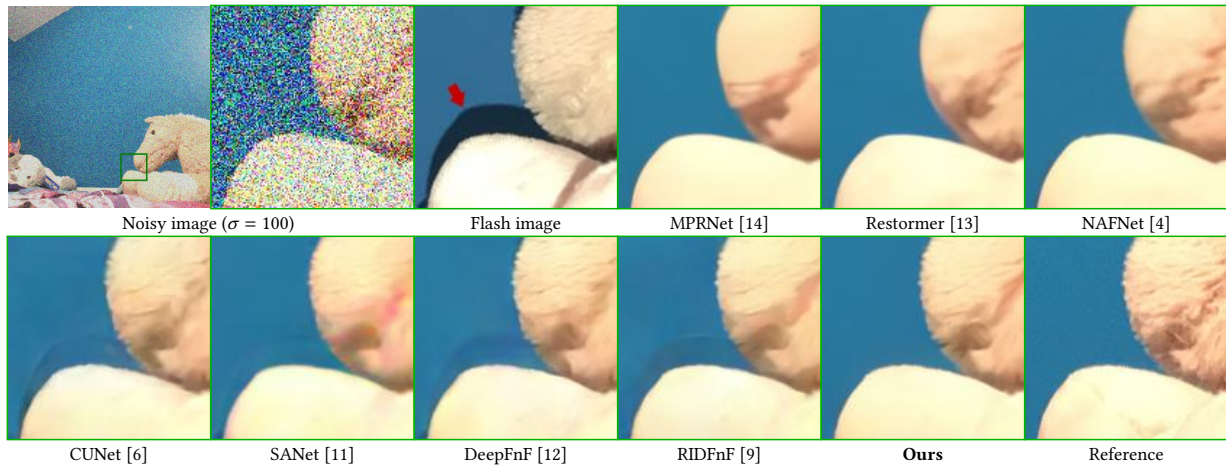

Figure 8: The qualitative comparisons for flash-guided no-flash image denoising on FAID [1] with  $\sigma = 100$ .
